# Supplementary material
Source: PubMed Central journal article supplement (PMC5679058)
Supplement: NIHMS895817-supplement-supplement_1.pdf [file NIHMS895817-supplement-supplement_1.pdf]

**Table S1: Weight Change from Baseline by Treatment Assignment.**

| <b>Variable</b> | <b>All</b>              | <b>Comparison</b>       | <b>Intervention</b>     | <b>p-value</b> |
|-----------------|-------------------------|-------------------------|-------------------------|----------------|
| 6 month         | +0.92 (4.10)<br>N = 270 | +1.33 (3.80)<br>N = 141 | +0.48 (4.38)<br>N = 129 | 0.060          |
| 12 month        | +0.82 (5.34)<br>N = 271 | +0.85 (5.77)<br>N = 140 | +0.78 (4.86)<br>N = 131 | 0.442          |
| 24 month        | +0.91 (7.49)<br>N = 225 | +1.45 (7.71)<br>N = 118 | +0.32 (7.34)<br>N = 107 | 0.157          |

All weights were measured in the clinic and pregnant women are excluded. All values are expressed as mean (std).

**Table S2: Biochemically verified smoking cessation (abstinent past 7 days)**

|                     | <b>6 Mo</b>        | <b>12 Mo</b>       | <b>24 Mo</b>       |
|---------------------|--------------------|--------------------|--------------------|
| <b>Total</b>        | 64 of 270 (23.70%) | 56 of 273 (20.51%) | 36 of 232 (15.52%) |
| <b>Comparison</b>   | 33 of 141 (23.40%) | 33 of 141 (23.40%) | 21 of 121 (17.36%) |
| <b>Intervention</b> | 31 of 129 (24.03%) | 23 of 132 (17.42%) | 15 of 111 (13.51%) |
| <b>P-value*</b>     | 0.904              | 0.221              | 0.420              |

\*) Association of group with smoking cessation status at each respective point in time.

Note: These include the obtained measurements from pregnant participants that were excluded from the weight-measurements

**Table S3: Weight-outcome at 6, 12, and 24 month depending on smoking cessation status at 6 month follow-up**

| <b>Variable</b>                    | <b>Comparison</b> | <b>Intervention</b> | <b>p-value</b> |
|------------------------------------|-------------------|---------------------|----------------|
| <b>Weight Change at 6 Mo (kg)</b>  |                   |                     |                |
| Abstinent at 6 Mo                  | +2.58 (3.37)      | +1.21 (5.27)        | 0.216          |
| Smoker at 6 Mo                     | +0.85 (3.78)      | +0.24 (4.07)        | 0.275          |
| <b>Weight Change at 12 Mo (kg)</b> |                   |                     |                |
| Abstinent at 6 Mo                  | +3.22 (6.37)      | +1.68 (5.97)        | 0.333          |
| Smoker at 6 Mo                     | +0.12 (5.40)      | +0.52 (4.50)        | 0.562          |
| <b>Weight Change at 24 Mo (kg)</b> |                   |                     |                |
| Abstinent at 6 Mo                  | +3.61 (11.21)     | +2.55 (8.09)        | 0.687          |
| Smoker at 6 Mo                     | +0.75 (6.08)      | -0.47 (6.79)        | 0.223          |

Abstinence is 7-day point prevalence abstinence at the 6 month visit. All weights were measured in the clinic and pregnant women are excluded. All values are expressed as mean (std).

**Table S4:** Weight-outcome at 24 month by smoking cessation status (7-day point prevalence) (clinic-determined weights, pregnant women excluded).

|                            | <b>All</b>    | <b>Abstinent at 24 Month</b> | <b>Not abstinent at 24 Month</b> | <b>p-value</b> |
|----------------------------|---------------|------------------------------|----------------------------------|----------------|
| <b>All</b>                 | N = 225 (68%) | N = 33 (14.7%)               | N=192 (85.3%)                    |                |
| Weight Change from BL (kg) | +0.91 (7.49)  | +4.17 (12.16)                | +0.36 (6.24)                     | 0.017          |
| <b>Comparison</b>          | N = 118 (72%) | N = 20 (16.9%)               | N = 98 (83.1%)                   |                |
| Weight Change from BL (kg) | +1.45 (7.71)  | +3.56 (14.02)                | +1.02 (5.66)                     | 0.181          |
| <b>Intervention</b>        | N = 107 (64%) | N = 13 (12.1%)               | N=94(87.9%)                      |                |
| Weight Change from BL (kg) | +0.32 (7.34)  | +5.10 (9.01)                 | -0.34 (6.75)                     | 0.048          |

**Figure S1: Biochemically verified 7-day point abstinence across clinic visits.**

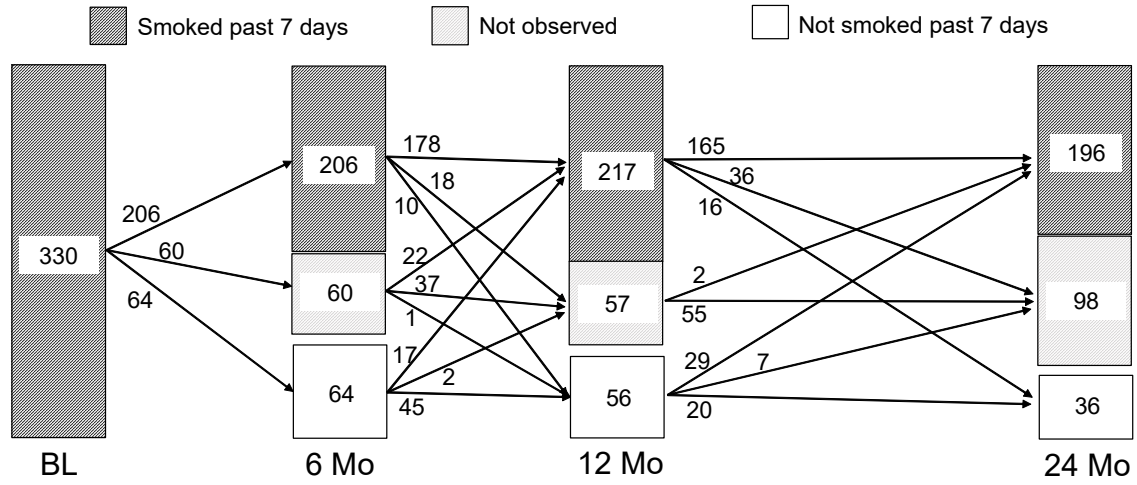

17 participants were observed abstinent at all three follow-up visits (not readily identified in above figure)

Figure S2 Intervention Group Use of Interactive Technology by Month

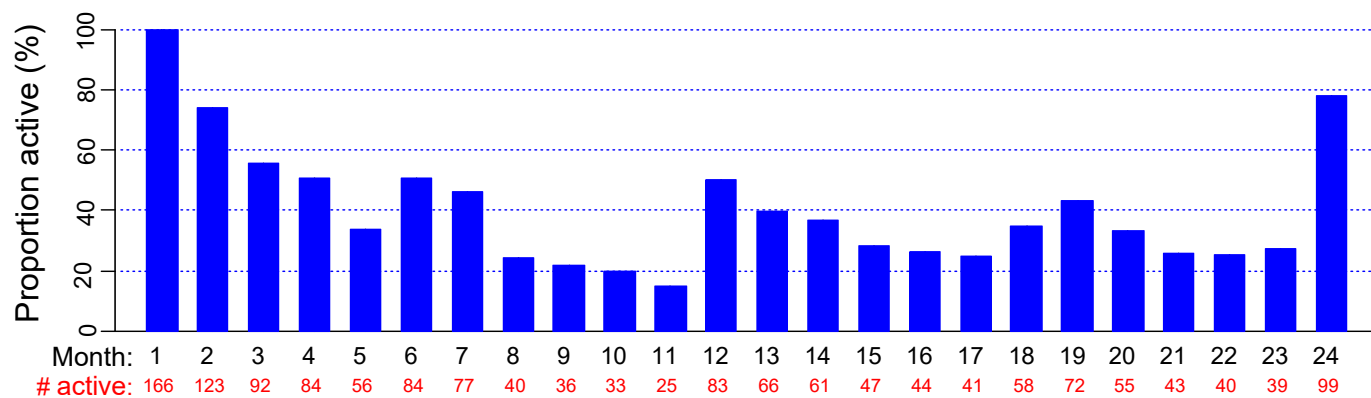

Proportion of Intervention Participant using any component of the Interactive Technology Intervention.
